# Supplementary material
Source: PubMed Central journal article supplement (PMC2818214)

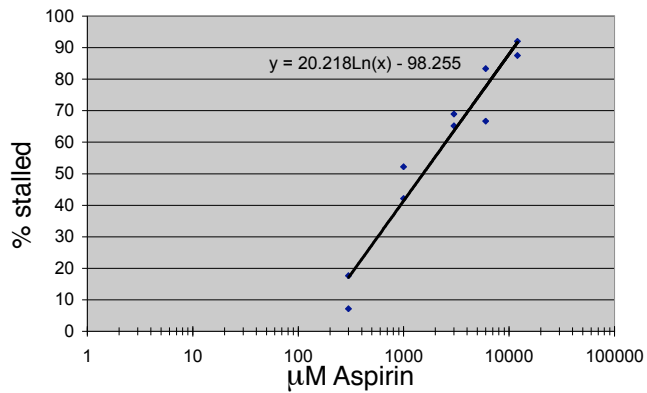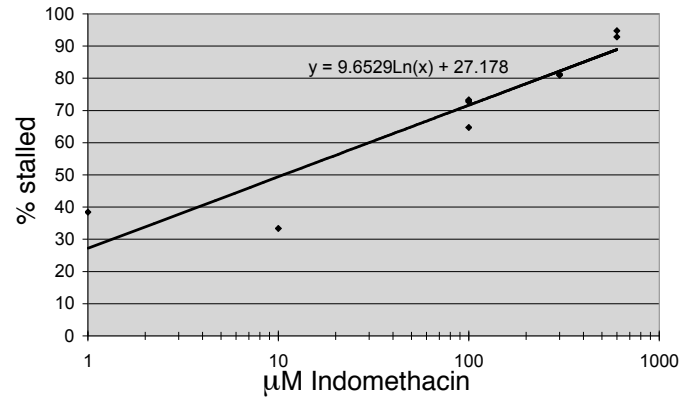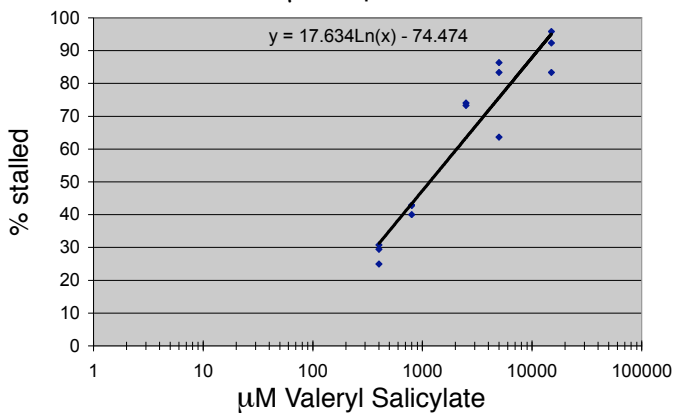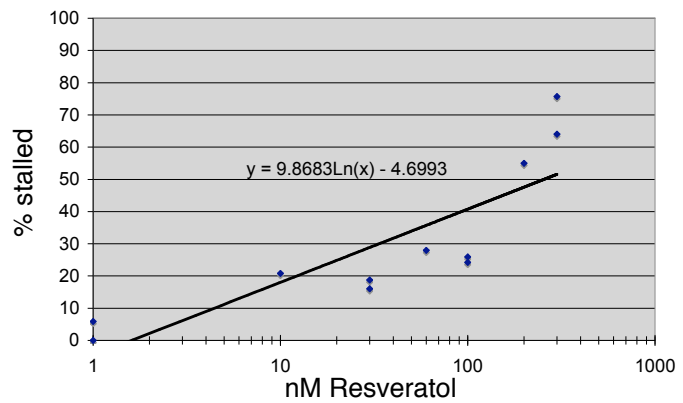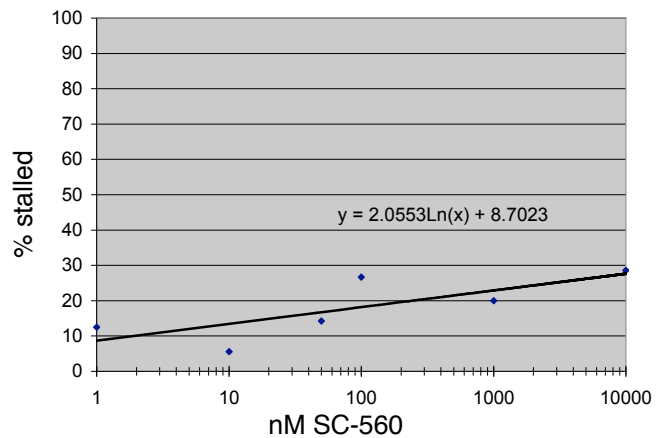

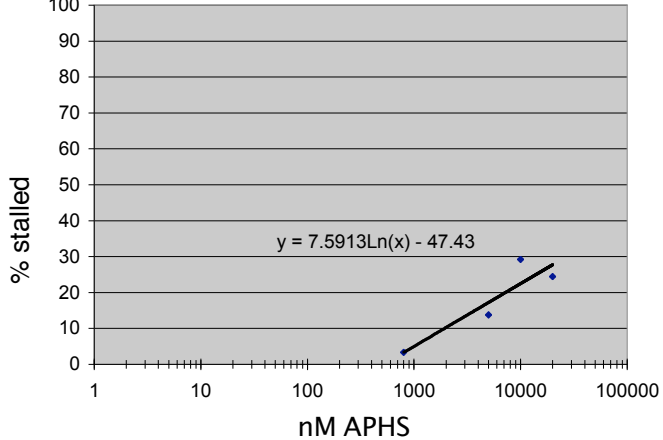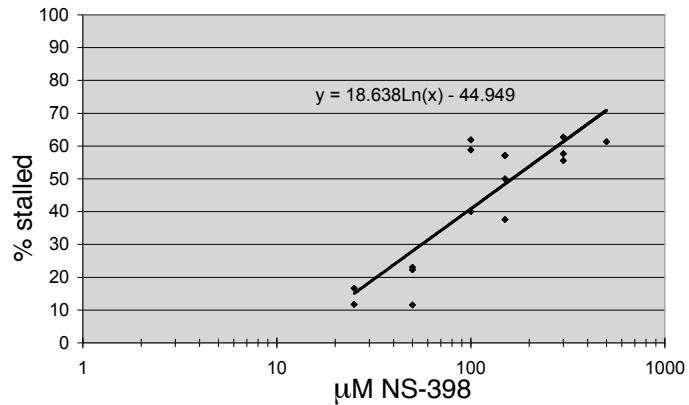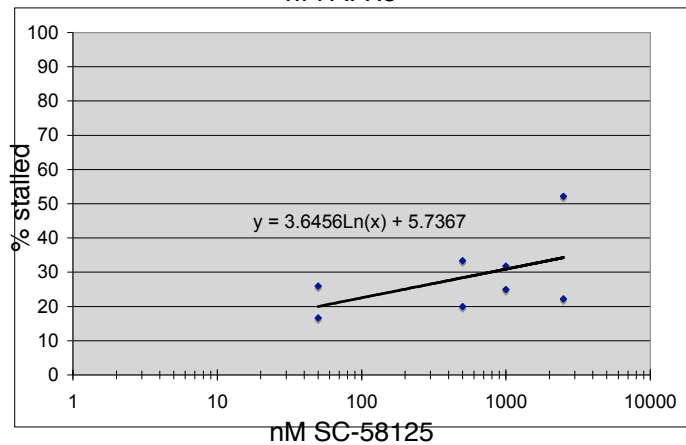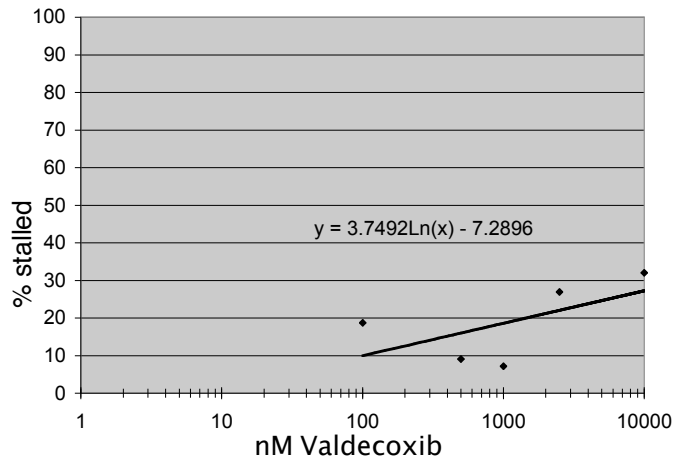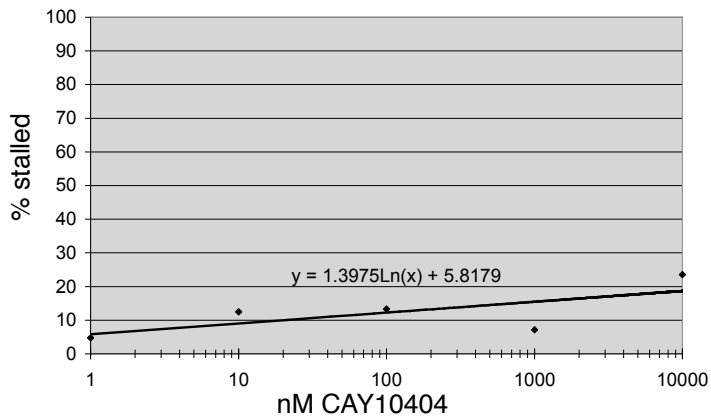

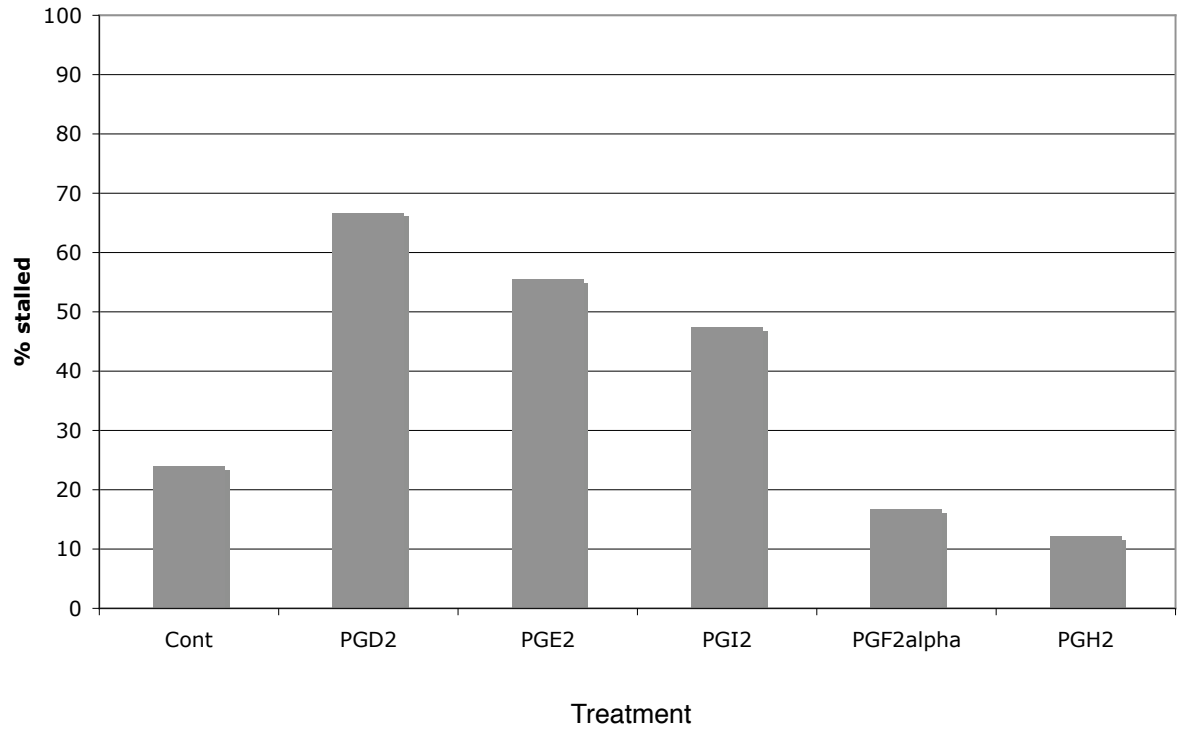

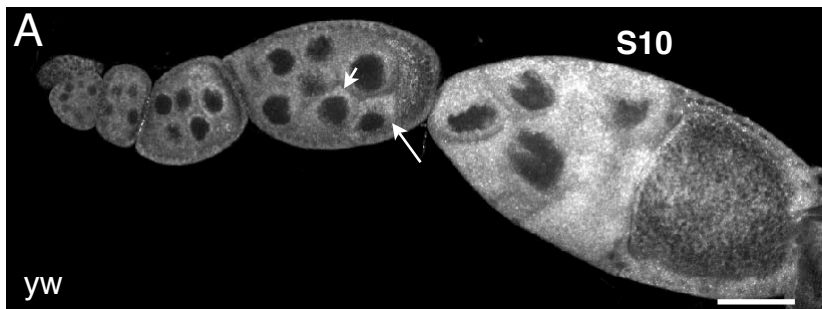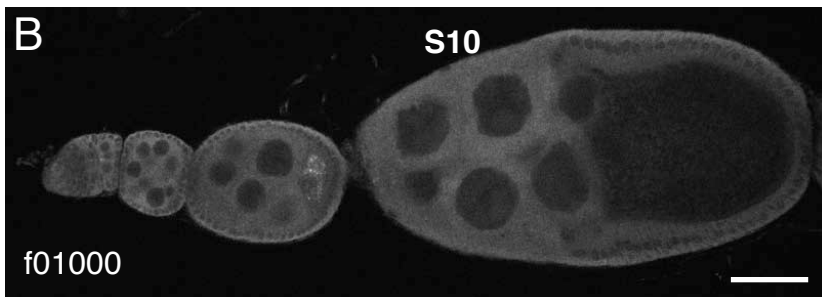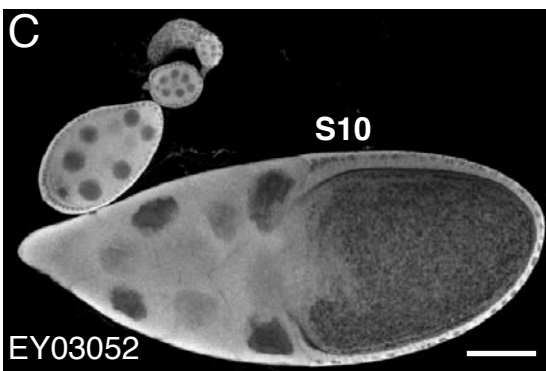

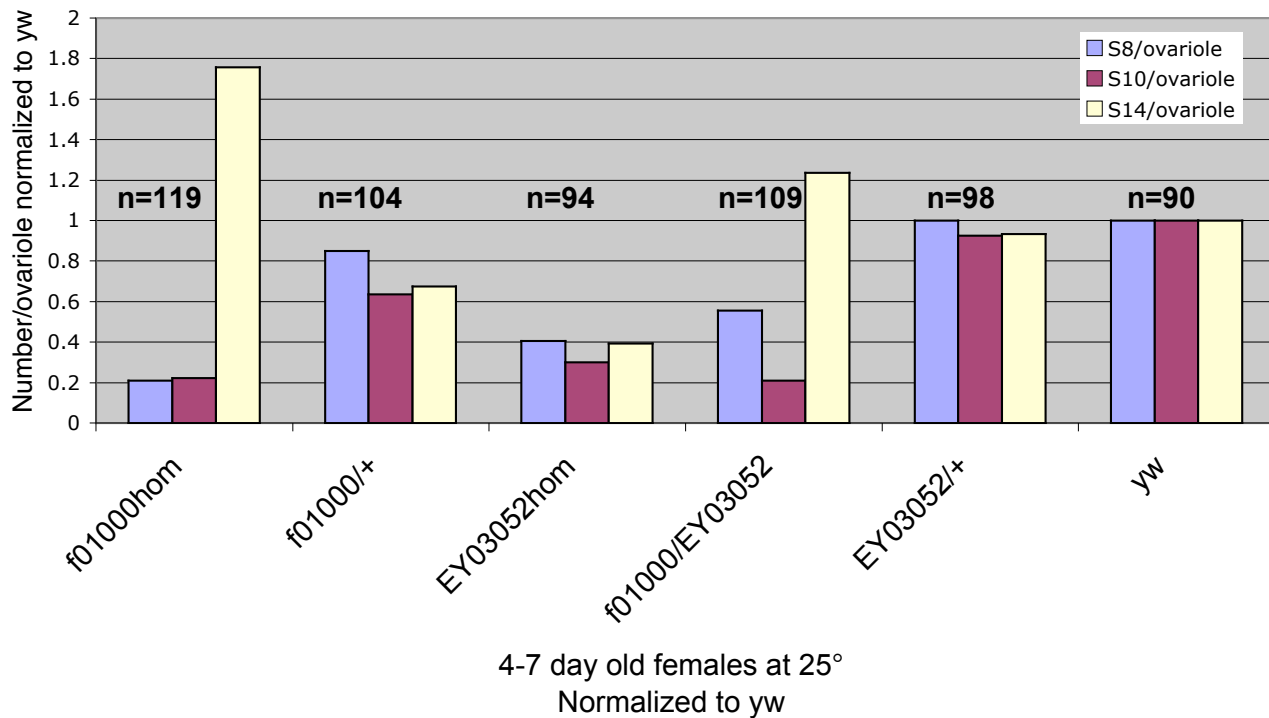

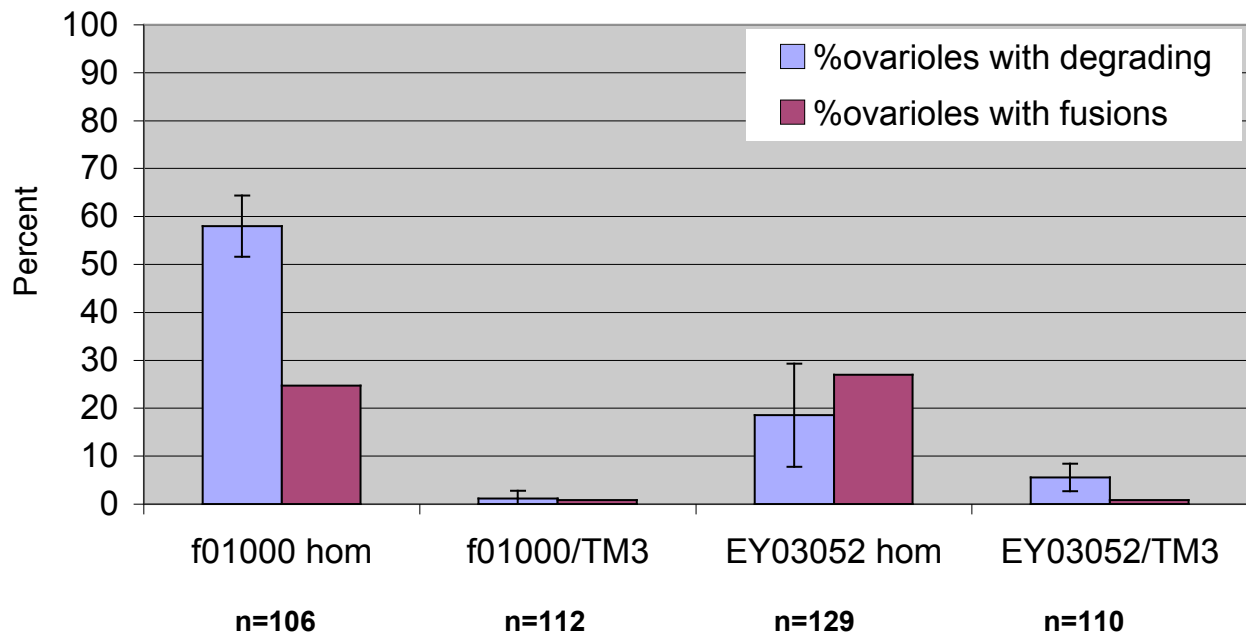

Supplement: NIHMS148891-supplement-01.pdf [file NIHMS148891-supplement-01.pdf]
